# Supplementary material for: Global prevalence of antidepressant drug utilization in the community: protocol for a systematic review
Source: HighWire-hosted journal article supplement (doi:10.1136/bmjopen-2022-062197), 2022-05-01
Supplement: bmjopen-2022-062197supp001_data_supplement.pdf [file bmjopen-2022-062197supp001_data_supplement.pdf]

**Supplementary file 1 – Full search strategies**

Ovid Multifile

Database: Ovid MEDLINE: Epub Ahead of Print, In-Process & Other Non-Indexed Citations, Ovid MEDLINE® Daily and Ovid MEDLINE® <1946-Present>, Embase Classic+Embase <1947 to 2021 April 29>  
 Search Strategy:

- 
- 1 Antidepressive Agents/ (139870)
  - 2 (antidepressant\* or anti-depressant\* or antidepressive\* or anti-depressive\* or neurothymoleptic\* or neuro-thymoleptic\* or psychoenergi#er\* or psycho-energi#er\* or thymoanaleptic\* or thymoleptic\* or thymolytic\*).tw,kf. (177266)
  - 3 ((antidepression or anti-depression) adj (agent? or drug? or medication? or pharmaceutic\* or prescription?)).tw,kf. (133)
  - 4 Serotonin Uptake Inhibitors/ (65207)
  - 5 ((5 ht or 5ht or 5-hydroxytryptamine or serotonin) adj2 ((uptake or reuptake or re-uptake) adj inhibitor?)).tw,kf. (42043)
  - 6 (SSRI or SSRIs).tw,kf. (27705)
  - 7 "Serotonin and Noradrenaline Reuptake Inhibitors"/ (6522)
  - 8 ((dual monoamine or triple monoamine or noradrenaline or nor-adrenaline or norepinephrine or nor-epinephrine) adj2 ((uptake or reuptake or re-uptake) adj inhibitor?)).tw,kf. (8884)
  - 9 ((dual uptake or dual reuptake or dual re-uptake or triple uptake or triple reuptake or triple re-uptake) adj inhibitor?)).tw,kf. (509)
  - 10 (SNRI or SNRIs or SSNRI or SSNRIs or NRI or NRIs or SNDRI or SNDRI).tw,kf. (9161)
  - 11 Monoamine Oxidase Inhibitors/ (29352)
  - 12 ((amine oxidase or MAO or monoamine or mono amine or monoamino\* or mono amino\* or tyraminase) adj2 inhibitor?)).tw,kf. (19974)
  - 13 MAO inhibit\*.tw,kf. (5338)
  - 14 (MAOI or MAOIs).tw,kf. (2485)
  - 15 (RIMA or RIMAs).tw,kf. (1203)
  - 16 Antidepressive Agents, Tricyclic/ (44259)
  - 17 ((tricyclic\* or tri-cyclic\*) adj2 (antidepress\* or anti-depress\*)).tw,kf. (24286)
  - 18 ((TCA or TCAs) and (antidepress\* or anti-depress\*)).tw,kf. (4650)
  - 19 Antidepressive Agents, Second-Generation/ (99918)
  - 20 ((atypical or 2nd generation or second generation) adj2 (antidepress\* or anti-depress\*)).tw,kf. (2177)
  - 21 Citalopram/ (28532)
  - 22 (citalopram\$2 or escitalopram\$2 or lexapro\$2 or 59729-33-8 or 0DHU5B8D6V).tw,kf,rn. (39430)
  - 23 (acelopam\$2 or adeprenal\$2 or apo-cital\$2 or aurex\$2 or ceform\$2 or celexa\$2 or cilopress\$2 or cinavol\$2 or ciprager\$2 or cipram\$2 or cipramil\$2 or cipraned\$2 or ciprotan\$2 or ciral\$2 or citabex\$2 or citacip\$2 or citagen\$2 or cital\$2 or citalec\$2 or citalich\$2 or citalon\$2 or citalonte\$2 or citalostad\$2 or citalox\$2 or citalver\$2 or citapram\$2 or citaxin\$2 or citesint\$2 or citopam\$2 or citrol\$2 or citronil\$2 or cytalopram\$2 or dalsan\$2 or elopram\$2 or exenadil\$2 or frimaind\$2 or futuril\$2 or galapran\$2 or humorap\$2 or kaidor\$2 or kitapram\$2 or linisan\$2 or loprakil\$2 or lopraxer\$2 or loxopgram\$2 or "lu 10 171" or "lu 10171" or "lu10 171" or lu10171 or lupram\$2 or malicon\$2 or nitalapram\$2 or oropgram\$2 or percitale\$2 or pralotam\$2 or pramital\$2 or prefucet\$2 or pricital\$2 or prisdal\$2 or psiconor\$2 or renevil\$2 or ricap\$2 or ropramin\$2 or selon\$2 or sepram\$2 or seralgan\$2 or seregra\$2 or serital\$2 or seropram\$2 or seror\$2 or sintopram\$2 or sotovon\$2 or talam\$2 or talosin\$2 or varom\$2 or vesema\$2

- or xadorek\$2 or zanipram\$2 or "zd 211" or zd211 or zeclicid\$2 or zentius\$2 or zitolex\$2 or zyloram\$2).tw,kf,rn. (4564)
- 24 (escitalopram\$2 or cipralex\$2 or enlift\$2 or entact\$2 or esciprex\$2 or "lu 26054 0" or "lu 260540" or lu260540 or premalex\$2 or prilect\$2 or seroplex\$2 or sipralexa\$2 or zecidec\$2 or zocital\$2 or 128196-01-0 or 4O4S742ANY).tw,kf,rn. (16548)
- 25 Fluoxetine/ (57704)
- 26 (fluoxetine\$2 or actan\$2 or adofen\$2 or afeksin\$2 or "alzac 20" or andep\$2 or andepin\$2 or ansilan\$2 or "atd 20" or auroken\$2 or auscap\$2 or bioxetin\$2 or captaton\$2 or daforin\$2 or dagrilan\$2 or depren\$2 or deprex\$2 or deprexetin\$2 or deprexin\$2 or deprizac\$2 or deproxin\$2 or diesan\$2 or digassim\$2 or elizac\$2 or exostrept\$2 or felicium\$2 or fldiss\$2 or flotinal\$2 or floxet\$2 or fluctin\$2 or fluctine\$2 or fludac\$2 or flufuran\$2 or fluketin\$2 or flunil\$2 or flunirin\$2 or fluohexal\$2 or fluoksetin\$2 or fluoksetyna\$2 or fluox\$2 or fluoxac\$2 or fluoxeren\$2 or fluoxetin\$2 or fluoxetina\$2 or fluoxifar\$2 or fluoxil\$2 or fluoxone\$2 or fluoxtab\$2 or fluronin\$2 or flusac\$2 or flustad\$2 or flutin\$2 or flutine\$2 or fluxemed\$2 or fluxen\$2 or fluxet\$2 or fluxetil\$2 or fluxil\$2 or fluxomed\$2 or fluzac\$2 or fokeston\$2 or fontex\$2 or foxetin\$2 or foxtin\$2 or fropine\$2 or fuloren\$2 or gerozac\$2 or ladose\$2 or lanclis\$2 or "lilly 110140" or lilly110140 or lorien\$2 or lovan\$2 or luramon\$2 or "ly 110140" or ly110140 or magrilan\$2 or margrilan\$2 or meropan\$2 or modipran\$2 or mutan\$2 or nopres\$2 or nuzak\$2 or olena\$2 or oxactin\$2 or oxedep\$2 or plazeron\$2 or plinzene\$2 or pragmaten\$2 or prizma\$2 or proctin\$2 or prodep\$2 or prosac\$2 or prozac\$2 or prozamel\$2 or prozamin\$2 or prozep\$2 or prozit\$2 or psipax\$2 or qualisac\$2 or rapiflux\$2 or reneuron\$2 or rowexetina\$2 or salipax\$2 or sanzur\$2 or sarafem\$2 or sartuzin\$2 or selfemra\$2 or seromex\$2 or seronil\$2 or sinzac\$2 or sofelin\$2 or stephadilat-s\$2 or xeredien\$2 or zactin\$2 or zepax\$2 or zinovat\$2 or 54910-89-3 or 01K63SUP8D).tw,kf,rn. (1078328)
- 27 Fluvoxamine/ (15400)
- 28 (fluvoxamine\$2 or DU-23000 or desiflu\$2 or dumirox\$2 or faverin\$2 or fevarin\$2 or floxyfral\$2 or fluvoxadura\$2 or fluvoxamin\$2 or fluvoxamina\$2 or luvox\$2 or 54739-18-3 or O4L1XPO44W).tw,kf,rn. (17458)
- 29 (nefazodone\$2 or "bmy 13754" or "bmy 13754 1" or bmy13754 or "bmy13754 1" or bmy137541 or dutonin\$2 or "mj 13754" or "mj 13754 1" or mj13754 or "mj13754-1" or mj137541 or menfazona\$2 or nefadar\$2 or nefazadone\$2 or reseril\$2 or rulivan\$2 or serzone\$2 or serzonil\$2 or 83366-66-9 or 59H4FCV1TF).tw,kf,rn. (6243)
- 30 Paroxetine/ (32492)
- 31 (paroxetine\$2 or arketis\$2 or aropax\$2 or aroxat\$2 or brisdelle\$2 or "brl 29060" or "brl 29060a" or brl29060 or brl29060a or daparox\$2 or deroxat\$2 or dexorat\$2 or divarius\$2 or dropax\$2 or euplix\$2 or eutimil\$2 or "fg 7051" or fg7051 or frosinor\$2 or motivan\$2 or optipar\$2 or paluxetil\$2 or paluxon\$2 or paroc\$2 or parogen\$2 or paroxedura\$2 or paroxet\$2 or paroxetin\$2 or paroxetina\$2 or paroxia\$2 or paxan\$2 or paxil\$2 or paxtine\$2 or paxxet\$2 or paxxet\$2 or sereupin\$2 or seroxat\$2 or setine\$2 or si 211103 or si211103 or solben\$2 or syntopar\$2 or tagonis\$2 or 61869-08-7 or 41VRH5220H).tw,kf,rn. (35895)
- 32 Sertraline/ (30357)
- 33 (sertraline\$2 or adjuvin\$2 or altruline\$2 or aremis\$2 or atruline\$2 or besitran\$2 or "cp 51974" or cp51974 or "cp 519741" or cp519741 or dominum\$2 or doxime\$2 or fatral\$2 or fridep\$2 or gladem\$2 or lesefer\$2 or lustral\$2 or nudep\$2 or sealdin\$2 or seltra\$2 or serad\$2 or sercerin\$2 or serlain\$2 or serlift\$2 or sertralin\$2 or sertranex\$2 or sertranquil\$2 or sosser\$2 or tatig\$2 or tresleen\$2 or zolof\$2 or zoloft\$2 or zosert\$2 or 79617-96-2 or QUC7NX6WMB).tw,kf,rn. (33443)
- 34 Trazodone/ (13945)
- 35 (trazodone\$2 or af-1161 or azonz\$2 or beneficat\$2 or bimaran\$2 or deprax\$2 or depresil\$2 or depyrel\$2 or desirel\$2 or desyrel\$2 or "kb 831" or manegan\$2 or molipaxin\$2 or oleptro\$2 or pesyrel\$2

or pragazone\$2 or pragmarel\$2 or pragmazone\$2 or reslin\$2 or taxagon\$2 or thombran\$2 or thromban\$2 or thrombran\$2 or tombran\$2 or tradozone\$2 or trasodon\$2 or trasodone\$2 or trazodil\$2 or trazodon\$2 or trazolan\$2 or trazon\$2 or trialodine\$2 or trittico\$2 or 19794-93-5 or YBK48BXK30).tw,kf,rn. (14995)

36 Vilazodone Hydrochloride/ (774)

37 (vilazodone\$2 or "emd 68843" or emd68843 or "sb 659746" or "sb 659746a" or sb659746 or sb659746a or viibryd\$2 or 163521-12-8 or S239O2O0V3).tw,kf,rn. (873)

38 Vortioxetine/ (1494)

39 (vortioxetine\$2 or brintellix\$2 or "lu aa21004" or luaa21004 or trintellix\$2 or 508233-74-7 or 3O2K1S3WQV).tw,kf,rn. (1752)

40 Amitriptyline/ (47860)

41 (amitriptyline\$2 or adepress\$2 or adepril\$2 or ambivalon\$2 or amilit\$2 or amineurin\$2 or amiplin\$2 or amiprin\$2 or amiroI\$2 or amitid\$2 or amitril\$2 or amitrip\$2 or amitriptylene\$2 or amitriptylin\$2 or amitriptylinumhydrochloride\$2 or amitryptiline\$2 or amitryptilline\$2 or amitryptine\$2 or amitryptylene\$2 or amyline\$2 or amytril\$2 or amytriptiline\$2 or amytriptylene\$2 or amytriptiline\$2 or amyazol\$2 or anapsique\$2 or "anp 3548" or antalin\$2 or antitriptyline\$2 or damilen\$2 or damilene\$2 or damitriptyline\$2 or damylene\$2 or deprelie\$2 or domical\$2 or elatrol\$2 or elatrolet\$2 or elavil\$2 or enafon\$2 or endep\$2 or enovil\$2 or etafon\$2 or etafon\$2 or euplit\$2 or lantron\$2 or laroxal\$2 or lentizol\$2 or miketorin\$2 or "mk 230" or "n 750" or novoprotect\$2 or ormal\$2 or pinsaun\$2 or proheptadien\$2 or qualitriptine\$2 or redomex\$2 or "ro 4 1575" or sarboten retard\$2 or sarotard\$2 or saroten\$2 or sarotena\$2 or sarotex\$2 or stelminal\$2 or sylvemid\$2 or syneudon\$2 or syneydon\$2 or teperin\$2 or terepin\$2 or trepiline\$2 or tridep\$2 or tripta or triptaR or triptaTM or triptanol\$2 or triptizol\$2 or triptyl\$2 or triptyline\$2 or trynol\$2 or tryptanol\$2 or tryptizol\$2 or trytomer\$2 or uxen or uxenR or uxenTM or vanatrip\$2 or 50-48-6 or 1806D8D52K).tw,kf,rn. (52240)

42 Clomipramine/ (20960)

43 (clomipramine\$2 or anafranil\$2 or anafranilin\$2 or anafranyl\$2 or chlomipramine\$2 or chlorimipramine\$2 or chloroimipramine\$2 or clofranil\$2 or clomicalm\$2 or clomipramin\$2 or clomipramine\$2 or clopress\$2 or domipramine\$2 or equinorm\$2 or "g 34586" or g34586 or gromin\$2 or hydiphen\$2 or monochlor imipramine\$2 or monochlorimipramine\$2 or monochloroimipramine\$2 or placil\$2 or zoiral\$2 or 303-49-1 or NUV44L116D).tw,kf,rn. (22928)

44 Desvenlafaxine Succinate/ (2093)

45 (desvenlafaxine\$2 or "dvs 233" or dvs233 or ellefore\$2 or khedezla\$2 or pristiq\$2 or pristiqs\$2 or "wy 45233" or wy45233 or 93413-62-8 or NG99554ANW).tw,kf,rn. (2124)

46 Doxepin/ (10595)

47 (doxepin\$2 or adapin\$2 or anten or antenR or antenTM or aponal\$2 or co dox\$2 or curatin\$2 or deptran\$2 or desidox\$2 or doneurin\$2 or doxal\$2 or doxepine\$2 or expan or expanR or expanTM or gilex\$2 or mareen\$2 or "nsc 108160" or "p 3693a" or prudoxin\$2 or quitaxon\$2 or silenor\$2 or sinequan\$2 or sinquan\$2 or sinquane\$2 or zonalon\$2 or 1668-19-5 or 5ASJ6HUZ7D).tw,kf,rn. (12898)

48 Duloxetine Hydrochloride/ (13292)

49 (duloxetine\$2 or ariclaim\$2 or cymbalta\$2 or drizalma\$2 or dulane\$2 or duzela\$2 or irenka\$2 or "ly 227942" or ly227942 or "ly 248686" or ly248686 or xeristar\$2 or yentreve\$2 or 116539-59-4 or O5TNM5N07U).tw,kf,rn. (14584)

50 Imipramine/ (47078)

51 (imipramine\$2 or antidep\$2 or antideprin\$2 or berkomin\$2 or chrytemin\$2 or daypress\$2 or deprinol\$2 or depsoI\$2 or depsonil\$2 or ethipramine\$2 or fronil\$2 or "g 22150" or g22150 or "g 22355" or g22355 or ia pram\$2 or imavate\$2 or imidol\$2 or imipramide\$2 or imipramin\$2 or imiprin\$2 or imizin\$2 or imizine\$2 or janimine\$2 or melipramin\$2 or melipramine\$2 or norchlorimipramine\$2 or norpramine\$2 or novopramine\$2 or pramine\$2 or presamine\$2 or primonil\$2 or pryleun\$2 or

psychoforin\$2 or psychoforine\$2 or sermonil\$2 or servipramine\$2 or sk pramine\$2 or talpramin\$2 or tofranil\$2 or trofanil\$2 or venefon\$2 or 50-49-7 or OGG85SX4E4).tw,kf,rn. (51712)

52 Milnacipran/ (3157)

53 (milnacipran\$2 or "f 2207" or f2207 or "f 2695" or f2695 or fetzima\$2 or impulsor\$2 or ixel\$2 or levomilnacipran\$2 or midalcipran\$2 or savella\$2 or "tn 912" or tn912 or toledomin\$2 or 92623-85-3 or G56VK1HF36).tw,kf,rn. (3601)

54 Venlafaxine Hydrochloride/ (24848)

55 (venlafaxine\$2 or aplaven\$2 or dobupal\$2 or duofaxin\$2 or efectin\$2 or efexor\$2 or effexor\$2 or elafax\$2 or faxiprol\$2 or genexin\$2 or pracet\$2 or serosmine\$2 or sunveniz\$2 or trevilor\$2 or trewilor\$2 or vandrai\$2 or vaxor\$2 or venix-xr\$2 or venla\$2 or venlabrain\$2 or venlafaxin\$2 or venlafaxina\$2 or venlalic\$2 or venlaneo\$2 or venlax\$2 or venlaxin\$2 or venlazid\$2 or venxin\$2 or venzip\$2 or viepax\$2 or "wy 45030" or wy45030 or zarelis\$2 or 93413-69-5 or GRZ5RCB1QG).tw,kf,rn. (26911)

56 (bifemelane\$2 or alnert\$2 or celeport\$2 or "mci 2016" or mci2016 or 90293-01-9 or Z4501GN13G).tw,kf,rn. (365)

57 Isocarboxazid/ (1949)

58 (isocarboxazid\$2 or bmih\$2 or enerzer\$2 or isocarboazide\$2 or isocarboxacid\$2 or isocarboxazide\$2 or marplan\$2 or "ro 5 0831" or "ro 50831" or "u 10387 59-63-2" or 34237V843T).tw,kf,rn. (2074)

59 Moclobemide/ (5385)

60 (moclobemide\$2 or arima\$2 or aurorex\$2 or aurorix\$2 or deprenorm\$2 or feraken\$2 or manerix\$2 or meclobemide\$2 or moclaime\$2 or moclamide\$2 or moclamine\$2 or moclix\$2 or moclobamide\$2 or moclobamid\$2 or moclobeta\$2 or moclodura\$2 or moclonorm\$2 or rimoc\$2 or "ro 11 1163" or "ro 111163" or zorix\$2 or 71320-77-9 or PJ0Y7AZB63).tw,kf,rn. (8446)

61 MAO A inhibitor?.tw,kf,rn. (1346)

62 Phenelzine/ (7359)

63 (phenelzine\$2 or benzylmethylhydrazine\$2 or beta phenethylhydrazine\$2 or beta phenylethylhydrazine\$2 or fenelzin\$2 or fenelzine\$2 or fenizin\$2 or mao rem\$2 or nardelzine\$2 or nardil\$2 or phenalzine\$2 or phenelzin\$2 or phenethylhydrazine\$2 or phenylethylhydrazine\$2 or stinerval\$2 or "w 1544" or w1544 or 51-71-8 or O408N561GF).tw,kf,rn. (7780)

64 (toloxatone\$2 or humoryl\$2 or perenum\$2 or 29218-27-7 or 5T206015T5).tw,kf,rn. (408)

65 Tranylcypromine/ (8284)

66 (tranylcypromine\$2 or jatrosom\$2 or parmodalin\$2 or parnate\$2 or parnitene\$2 or parnitene\$2 or "sk and f 385" or "skf 385" or "skf trans 385" or trancilpromine\$2 or trancylpromine\$2 or trancylprominesulfate\$2 or trancylprominesulphate\$2 or tranilacipromina\$2 or transamine\$2 or tranylcypomia\$2 or tranylcypromide\$2 or tranylcypromin\$2 or tranylcypromine\$2 or tylciprine\$2 or 155-09-9 or 3E3V44J4Z9).tw,kf,rn. (9057)

67 Mazindol/ (2493)

68 (mazindol\$2 or "AN-448" or dasten\$2 or degonan\$2 or diestet\$2 or drinamyl\$2 or fagolipo\$2 or liofindol\$2 or mazanor\$2 or manzindol\$2 or mazindole\$2 or pento adiparthrol\$2 or sanjorex\$2 or sanorex\$2 or slankosan\$2 or solu caps\$2 or teronac\$2 or teronak\$2 or 22232-71-9 or C56709M5NH).tw,kf,rn. (2983)

69 (amitriptyline\$2 or amioxid-neuraxpharm\$2 or amitriptyline n oxide\$2 or dano or danoR or danoTM or equilibrin\$2 or 4317-14-0 or TYR2U59WMA).tw,kf,rn. (52583)

70 Amoxapine/ (2733)

71 (amoxapine\$2 or adisen\$2 or amoxan\$2 or amoxapin\$2 or asendin\$2 or asendis\$2 or "cl 67,772" or "cl 67772" or "cl67,772" or "cl67772" or defanyl\$2 or demolox\$2 or desmethyloxapine\$2 or moxadil\$2 or 14028-44-5 or R63VQ857OT).tw,kf,rn. (2960)

- 72 (demexiptiline\$2 or demexiptyline\$2 or deparon\$2 or tinoran\$2 or 24701-51-7 or EYX738UZ5P).tw,kf,rn. (41)
- 73 Desipramine/ (28138)
- 74 (desipramine\$2 or "aw 1151129" or aw1151129 or demethylimipramine\$2 or deprexan\$2 or desimipramine\$2 or desipramin\$2 or desipramine\$2 or desmethyl imipramin\$2 or desmethyl imipramine\$2 or desmethylimipramin\$2 or desmethylimipramine\$2 or despiramine\$2 or "ex 4355" or ex4355 or "g 15020" or "g 35020" or g15020 or g35020 or "jb 8181" or jb8181 or n demethylimipramine\$2 or nebril\$2 or norimipramine\$2 or norpramin\$2 or norpramine\$2 or nortimil\$2 or "nsc 114901" or nsc114901 or pentrofrane\$2 or pertofran\$2 or pertofrane\$2 or pertofrin\$2 or pertofran\$2 or petrofrane\$2 or petylyl\$2 or "rmi 9,384a" or "rmi 9384a" or "rmi9,384a" or rmi9384a or sertofren\$2 or 50-47-5 or 58-28-6 or TG537D343B).tw,kf,rn. (31505)
- 75 (dibenzepin\$2 or bibenzepin\$2 or deprex\$2 or dibenzepine\$2 or dibenzepinum\$2 or dibenzoazepine\$2 or ecatril\$2 or "hf 1927" or hf1927 or "l.w. 1927" or neodalit\$2 or neodil\$2 or noveril\$2 or 4498-32-2 or 510SJZ1Y6L).tw,kf,rn. (1188)
- 76 (dimetacrin\$2 or dimetacrine\$2 or dimethacin\$2 or dimethacine\$2 or dimethacrin\$2 or dimethacrine\$2 or istonil\$2 or miroistonil\$2 or "sd 709" or 3759-07-7 or 4757-55-5 or O341NY501N).tw,kf,rn. (249)
- 77 Dothiepin/ (2786)
- 78 (dothiepin\$2 or altapin\$2 or depresym\$2 or dosulepin\$2 or dosulepine\$2 or dothapax\$2 or dothiepin\$2 or idom or idomR or idomTM or prepadine\$2 or prothiaden\$2 or prothiadene\$2 or prothiadene\$2 or prothiadine\$2 or protiaden\$2 or 113-53-1 or 897-15-4 or W13O82Z7HL).tw,kf,rn. (3028)
- 79 (imipraminoxide\$2 or elepsin\$2 or imipramine\$2 or imiprex\$2 or 6829-98-7 or 8MKS280XJW).tw,kf,rn. (51507)
- 80 Lofepramine/ (1221)
- 81 (lofepramine\$2 or amplit\$2 or deftan\$2 or feprapax\$2 or gam#nil\$2 or "leo 640" or lomont\$2 or tymelyt\$2 or "whr 2908a" or 23047-25-8 or 26786-32-3 or OCA4JT7PAW).tw,kf,rn. (1696)
- 82 (melitracen\$2 or dixeran\$2 or melitracene\$2 or melixeran\$2 or metrisil\$2 or 5118-29-6 or 10563-70-9 or Q7T0Y1109Z).tw,kf,rn. (553)
- 83 (metapramine\$2 or "19560 rp" or "rp 19560" or timaxel\$2 or 21730-16-5 or 303954M7YF).tw,kf,rn. (172)
- 84 (nitroxazepine\$2 or "233-go" or "2330 go" or "c 2330 go" or "c2330 go" or c2330go or sintamil\$2 or 16398-39-3 or CNU9GY55SI).tw,kf,rn. (74)
- 85 (nordoxepin\$2 or demethyldoxepin\$2 or desmethyldoxepin\$2 or "doxepin,nor\$2" or 1225-56-5 or F498JSH8R).tw,kf,rn. (440)
- 86 Nortriptyline/ (17647)
- 87 (nortriptyline\$2 or acetexa\$2 or allegron\$2 or altile\$2 or ateben\$2 or atilev\$2 or avantyl\$2 or aventyl\$2 or desitriptyline\$2 or desmethylamitriptylin\$2 or desmethylamitriptyline\$2 or "l 38489" or martimil\$2 or noramitriptyline\$2 or norfenazin\$2 or noritren\$2 or norline\$2 or norpress\$2 or nortrilen\$2 or nortrilene\$2 or nortriptylin\$2 or nortriptyline\$2 or nortrix\$2 or nortryptilin\$2 or nortryptiline\$2 or nortryptiline\$2 or nortyline\$2 or norventyl\$2 or ortrip\$2 or pamelor\$2 or paxtibi\$2 or psychostyl\$2 or sensaval\$2 or sensival\$2 or vividyl\$2 or 72-69-5 or BL03SY4LXB).tw,kf,rn. (18938)
- 88 (noxiptiline\$2 or agedal\$2 or "bay 1521" or bay1521 or "bayer 1521" or dibenzoxin\$2 or elronon\$2 or nogedal\$2 or noxiphylin\$2 or noxiptilin\$2 or noxiptiline\$2 or noxiptillin\$2 or noxiptilline\$2 or noxiptylin\$2 or noxiptyline\$2 or noxyptiline\$2 or 24573-06-6 or 3362-45-6 or DF7D3NY7EL).tw,kf,rn. (314)
- 89 Opipramol/ (1287)

- 90 (opipramol\$2 or dinsidon\$2 or ensidon\$2 or eusidon\$2 or "g 33040" or g33040 or insidon\$2 or nisidan\$2 or opipramole\$2 or pramolans\$2 or "rp 8307" or rp8307 or 315-72-0 or D23ZXO613C).tw,kf,rn. (1386)
- 91 (propizepin\$2 or propizepine\$2 or pyridobenzodiazepine\$2 or "up 106" or vagran\$2 or 10321-12-7 or 09B57945V9).tw,kf,rn. (1017)
- 92 Protriptyline/ (2889)
- 93 (protriptyline\$2 or amimetilina\$2 or concordin\$2 or maximed\$2 or "mk 240" or mk240 or protriphyline\$2 or protryptyline\$2 or triptil\$2 or vivactil\$2 or 438-60-8 or 4NDU154T12).tw,kf,rn. (3302)
- 94 (quinupramine\$2 or kevopril\$2 or kinupril\$2 or "lm 208" or 31721-17-2 or 29O61HFF4L).tw,kf,rn. (137)
- 95 (tianeptine\$2 or coxal\$2 or "s 1574" or s1574 or stablon\$2 or 72797-41-2 or 0T493YFU8).tw,kf,rn. (2295)
- 96 Trimipramine/ (4133)
- 97 (trimipramine\$2 or apo-trimip\$2 or eldoral\$2 or herphonal\$2 or "il 6001" or rhotrimine\$2 or "rp 7162" or sapilent\$2 or stangyl\$2 or sumontil\$2 or surmontil\$2 or trimepramine\$2 or trimeprimin\$2 or trimeprimine\$2 or trimepropimine\$2 or trimidura\$2 or trimineurin\$2 or trimipramine\$2 or trimoprimine\$2 or tripress\$2 or tydamine\$2 or 739-71-9 or 6S082C9NDT).tw,kf,rn. (4438)
- 98 or/1-97 [DRUG CLASSES/DRUGS OF INTEREST] (1492537)
- 99 Data Collection/ (312402)
- 100 Incidence/ (733335)
- 101 incidenc\*.tw,kf. (2052347)
- 102 Prevalence/ (1097648)
- 103 prevalen\*.tw,kf. (1987884)
- 104 Databases, Factual/ (109779)
- 105 ((admin\* or billing\* or claim? or factual or insurance or utili#ation) adj3 (data or database\* or data-base\* or databank\* or data-bank\* or dataset? or data-set? or statistic\*)).tw,kf. (146575)
- 106 exp Drug Prescriptions/sn [statistics & numerical data, trends] (9243)
- 107 Drug Utilization/ (42374)
- 108 Practice Patterns, Physicians'/sn, td [statistics & numerical data, trends] (24160)
- 109 or/99-108 [EPI FILTER] (4785817)
- 110 98 and 109 [DRUG CLASSES OF INTEREST - EPI FILTER] (77826)
- 111 exp Animals/ not Humans/ (16979954)
- 112 110 not 111 [ANIMAL-ONLY REMOVED] (56366)
- 113 (comment or editorial or letter or newspaper article or news).pt. (4064318)
- 114 112 not 113 [OPINION PIECES REMOVED] (55375)
- 115 limit 114 to yr="2010-current" (28582)
- 116 115 use ppez [MEDLINE RECORDS] (12995)
- 117 antidepressant agent/ (104014)
- 118 (antidepressant\* or anti-depressant\* or antidepressive\* or anti-depressive\* or neurothymoleptic\* or neuro-thymoleptic\* or psychoenergi#er\* or psycho-energi#er\* or thymoanaleptic\* or thymoleptic\* or thymolytic\*).tw,kw. (180736)
- 119 ((antidepressant or anti-depression) adj (agent? or drug? or medication? or pharmaceutical\* or prescription?)).tw,kw. (133)
- 120 serotonin uptake inhibitor/ (68901)
- 121 ((5 ht or 5ht or 5-hydroxytryptamine or serotonin) adj2 ((uptake or reuptake or re-uptake) adj inhibitor?)).tw,kw. (42788)
- 122 (SSRI or SSRIs).tw,kw. (28796)
- 123 serotonin noradrenalin reuptake inhibitor/ (6130)

- 124 triple reuptake inhibitor/ (264)
- 125 ((dual monoamine or triple monoamine or noradrenaline or nor-adrenaline or norepinephrine or nor-epinephrine) adj2 ((uptake or reuptake or re-uptake) adj inhibitor?)).tw,kw. (8996)
- 126 ((dual uptake or dual reuptake or dual re-uptake or triple uptake or triple reuptake or triple re-uptake) adj inhibitor?)).tw,kw. (524)
- 127 (SNRI or SNRIs or SSNRI or SSNRIs or NRI or NRIs or SNDRI or SNDRI).tw,kw. (9343)
- 128 monoamine oxidase inhibitor/ (29352)
- 129 ((amine oxidase or MAO or monoamine or mono amine or monoamino\* or mono amino\* or tyraminase) adj2 inhibitor?)).tw,kw. (19729)
- 130 MAO inhibit\*.tw,kw. (5457)
- 131 (MAOI or MAOIs).tw,kw. (2554)
- 132 (RIMA or RIMAs).tw,kw. (1233)
- 133 tricyclic antidepressant agent/ (34650)
- 134 ((tricyclic\* or tri-cyclic\*) adj2 (antidepress\* or anti-depress\*)).tw,kw. (24624)
- 135 ((TCA or TCAs) and (antidepress\* or anti-depress\*)).tw,kw. (4725)
- 136 ((atypical or 2nd generation or second generation) adj2 (antidepress\* or anti-depress\*)).tw,kw. (2202)
- 137 citalopram/ (28532)
- 138 (citalopram\$2 or escitalopram\$2 or lexapro\$2 or 59729-33-8 or ODHU5B8D6V).tw,kw,rn. (39455)
- 139 (acelopam\$2 or adeprenal\$2 or apo-cital\$2 or aurex\$2 or ceform\$2 or celexa\$2 or cilopress\$2 or cinavol\$2 or ciprager\$2 or cipram\$2 or cipramil\$2 or cipraned\$2 or ciprotan\$2 or ciral\$2 or citabex\$2 or citacip\$2 or citagen\$2 or cital\$2 or citalec\$2 or citalich\$2 or citalon\$2 or citalonte\$2 or citalostad\$2 or citalox\$2 or citalver\$2 or citapram\$2 or citaxin\$2 or citesint\$2 or citopam\$2 or citrol\$2 or citronil\$2 or cytalopram\$2 or dalsan\$2 or elopram\$2 or exenadil\$2 or frimaind\$2 or futuril\$2 or galapran\$2 or humorap\$2 or kaidor\$2 or kitapram\$2 or linisan\$2 or lopracil\$2 or lopraxer\$2 or loxopgram\$2 or "lu 10 171" or "lu 10171" or "lu10 171" or lu10171 or lupram\$2 or malicon\$2 or nitalapram\$2 or oropgram\$2 or percitale\$2 or pralotam\$2 or pramital\$2 or prefucet\$2 or pricital\$2 or prisdal\$2 or psiconor\$2 or renevil\$2 or ricap\$2 or ropramin\$2 or selon\$2 or sepram\$2 or seralgan\$2 or seregra\$2 or serital\$2 or seropram\$2 or seror\$2 or sintopram\$2 or sotovon\$2 or talam\$2 or talosin\$2 or varom\$2 or vesema\$2 or xadorek\$2 or zanipram\$2 or "zd 211" or zd211 or zeclicid\$2 or zentius\$2 or zitolex\$2 or zyloram\$2).tw,kw,rn. (4569)
- 140 escitalopram/ (17738)
- 141 (escitalopram\$2 or ciprallex\$2 or enlift\$2 or entact\$2 or esciprex\$2 or "lu 26054 0" or "lu 260540" or lu260540 or premalex\$2 or prilect\$2 or seroplex\$2 or siprallexa\$2 or zecidec\$2 or zocital\$2 or 128196-01-0 or 4O4S742ANY).tw,kw,rn. (16569)
- 142 fluoxetine/ (57704)
- 143 (fluoxetine\$2 or actan\$2 or adofen\$2 or afeksin\$2 or "alzac 20" or andep\$2 or andepin\$2 or ansilan\$2 or "atd 20" or auroken\$2 or auscap\$2 or bioxetin\$2 or captaton\$2 or daforin\$2 or dagrilan\$2 or depren\$2 or deprex\$2 or deprexetin\$2 or deprexin\$2 or deprizac\$2 or deproxin\$2 or diesan\$2 or digassim\$2 or elizac\$2 or exostrept\$2 or felicism\$2 or fldiss\$2 or flotinal\$2 or floxet\$2 or fluctin\$2 or fluctine\$2 or fludac\$2 or flufuran\$2 or fluketin\$2 or flunil\$2 or flunirin\$2 or fluohexal\$2 or fluoksetin\$2 or fluoksetyna\$2 or fluox\$2 or fluoxac\$2 or fluoxeren\$2 or fluoxetin\$2 or fluoxetina\$2 or fluoxifar\$2 or fluoxil\$2 or fluoxone\$2 or fluoxtab\$2 or fluronin\$2 or flusac\$2 or flustad\$2 or flutin\$2 or flutine\$2 or fluxemed\$2 or fluxen\$2 or fluxet\$2 or fluxetil\$2 or fluxil\$2 or fluxomed\$2 or fluzac\$2 or fokeston\$2 or fontex\$2 or foxetin\$2 or foxtin\$2 or fropine\$2 or fuloren\$2 or gerozac\$2 or ladose\$2 or lanclis\$2 or "lilly 110140" or lilly110140 or lorien\$2 or lovan\$2 or luramon\$2 or "ly 110140" or ly110140 or magrilan\$2 or margrilan\$2 or meropan\$2 or modipran\$2 or mutan\$2 or nopres\$2 or nuzak\$2 or olenas\$2 or oxactin\$2 or oxedep\$2 or plazeron\$2 or plinzene\$2 or pragmaten\$2 or prizma\$2 or

proctin\$2 or prodep\$2 or prosac\$2 or prozac\$2 or prozamel\$2 or prozamin\$2 or prozep\$2 or prozit\$2 or psipax\$2 or qualisac\$2 or rapiflux\$2 or reneuron\$2 or rowexetina\$2 or salipax\$2 or sanzur\$2 or sarafem\$2 or sartuzin\$2 or selfemra\$2 or seromex\$2 or seronil\$2 or sinzac\$2 or sofelin\$2 or stephadilat-s\$2 or xeredien\$2 or zactin\$2 or zepax\$2 or zinovat\$2 or 54910-89-3 or 01K63SUP8D).tw,kw,rn. (1080237)

144 fluvoxamine/ (15400)

145 (fluvoxamine\$2 or DU-23000 or desiflu\$2 or dumirox\$2 or faverin\$2 or fevarin\$2 or floxyfral\$2 or fluvoxadura\$2 or fluvoxamin\$2 or fluvoxamina\$2 or luvox\$2 or 54739-18-3 or O4L1XPO44W).tw,kw,rn. (17468)

146 nefazodone/ (5387)

147 (nefazodone\$2 or "bmy 13754" or "bmy 13754 1" or bmy13754 or "bmy13754 1" or bmy137541 or dutonin\$2 or "mj 13754" or "mj 13754 1" or mj13754 or "mj13754-1" or mj137541 or menfazona\$2 or nefadar\$2 or nefazadone\$2 or reseril\$2 or rulivan\$2 or serzone\$2 or serzonil\$2 or 83366-66-9 or 59H4FCV1TF).tw,kw,rn. (6246)

148 paroxetine/ (32492)

149 (paroxetine\$2 or arketis\$2 or aropax\$2 or aroxat\$2 or brisdelle\$2 or "brl 29060" or "brl 29060a" or brl29060 or brl29060a or daparox\$2 or deroxat\$2 or dexorat\$2 or divarius\$2 or dropax\$2 or euplix\$2 or eutimil\$2 or "fg 7051" or fg7051 or frosinor\$2 or motivan\$2 or optipar\$2 or paluxetil\$2 or paluxon\$2 or paroc\$2 or parogen\$2 or paroxedura\$2 or paroxet\$2 or paroxetin\$2 or paroxetina\$2 or paroxia\$2 or paxan\$2 or paxil\$2 or paxtine\$2 or paxxet\$2 or paxxet\$2 or sereupin\$2 or seroxat\$2 or setine\$2 or si 211103 or si211103 or solben\$2 or syntopar\$2 or tagonis\$2 or 61869-08-7 or 41VRH5220H).tw,kw,rn. (35932)

150 sertraline/ (30357)

151 (sertraline\$2 or adjuvin\$2 or altruline\$2 or aremis\$2 or atruline\$2 or besitran\$2 or "cp 51974" or cp51974 or "cp 519741" or cp519741 or dominum\$2 or doxime\$2 or fatral\$2 or fridep\$2 or gladem\$2 or lesefer\$2 or lustral\$2 or nudep\$2 or sealdin\$2 or seltra\$2 or serad\$2 or sercerin\$2 or serlain\$2 or serlift\$2 or sertralin\$2 or sertranex\$2 or sertranquil\$2 or sosser\$2 or tatig\$2 or tresleen\$2 or zolof\$2 or zoloft\$2 or zosert\$2 or 79617-96-2 or QUC7NX6WMB).tw,kw,rn. (33468)

152 trazodone/ (13945)

153 (trazodone\$2 or af-1161 or azonz\$2 or beneficat\$2 or bimaran\$2 or deprax\$2 or depresil\$2 or depyrel\$2 or desirel\$2 or desyrel\$2 or "kb 831" or manegan\$2 or molipaxin\$2 or oleptro\$2 or pesyrel\$2 or pragazone\$2 or pragmarel\$2 or pragmazone\$2 or reslin\$2 or taxagon\$2 or thombbran\$2 or thromban\$2 or thrombran\$2 or tombran\$2 or tradozone\$2 or trasodon\$2 or trasodone\$2 or trazodil\$2 or trazodon\$2 or trazolan\$2 or trazon\$2 or trialodine\$2 or trittico\$2 or 19794-93-5 or YBK48BXK30).tw,kw,rn. (15008)

154 vilazodone/ (774)

155 (vilazodone\$2 or "emd 68843" or emd68843 or "sb 659746" or "sb 659746a" or sb659746 or sb659746a or viibryd\$2 or 163521-12-8 or S239O2OOV3).tw,kw,rn. (879)

156 vortioxetine/ (1494)

157 (vortioxetine\$2 or brintellix\$2 or "lu aa21004" or luaa21004 or trintellix\$2 or 508233-74-7 or 3O2K1S3WQV).tw,kw,rn. (1762)

158 amitriptyline/ (47860)

159 (amitriptyline\$2 or adepress\$2 or adepril\$2 or ambivalon\$2 or amilit\$2 or amineurin\$2 or amiplin\$2 or amiprin\$2 or amirof\$2 or amitid\$2 or amitril\$2 or amitrip\$2 or amitriptylene\$2 or amitriptylin\$2 or amitriptylinumhydrochloride\$2 or amitryptiline\$2 or amitryptilline\$2 or amitryptine\$2 or amitryptylene\$2 or amyline\$2 or amytril\$2 or amytriptiline\$2 or amytriptylene\$2 or amytriptiline\$2 or amyzol\$2 or anapsique\$2 or "anp 3548" or antalin\$2 or antitriptyline\$2 or damilen\$2 or damilene\$2 or damitriptyline\$2 or damylene\$2 or deprelio\$2 or domical\$2 or elatrol\$2 or elatrolet\$2 or elavil\$2 or



- enafon\$2 or endep\$2 or enovil\$2 or etafon\$2 or etafon\$2 or euplit\$2 or lantron\$2 or laroxal\$2 or lentizol\$2 or miketorin\$2 or "mk 230" or "n 750" or novoprotect\$2 or ormal\$2 or pinsaun\$2 or proheptadien\$2 or qualitriptine\$2 or redomex\$2 or "ro 4 1575" or sarboten retard\$2 or sarotard\$2 or saroten\$2 or sarotena\$2 or sarotex\$2 or stelminal\$2 or sylvemid\$2 or syneudon\$2 or syneydon\$2 or teperin\$2 or terepin\$2 or trepiline\$2 or tridep\$2 or tripta or triptaR or triptaTM or triptanol\$2 or triptizol\$2 or triptyl\$2 or triptyline\$2 or trynol\$2 or tryptanol\$2 or tryptizol\$2 or trytomer\$2 or uxen or uxenR or uxenTM or vanatrip\$2 or 50-48-6 or 1806D8D52K).tw,kw,rn. (52262)
- 160 clomipramine/ (20960)
- 161 (clomipramine\$2 or anafranil\$2 or anafranilin\$2 or anafranyl\$2 or chlomipramine\$2 or chlorimipramine\$2 or chloroimipramine\$2 or clofranil\$2 or clomicalm\$2 or clomipramin\$2 or clomipramine\$2 or clopress\$2 or domipramine\$2 or equinorm\$2 or "g 34586" or g34586 or gromin\$2 or hydiphen\$2 or monochlor imipramine\$2 or monochlorimipramine\$2 or monochloroimipramine\$2 or placil\$2 or zoiral\$2 or 303-49-1 or NUV44L116D).tw,kw,rn. (22936)
- 162 desvenlafaxine/ (2093)
- 163 (desvenlafaxine\$2 or "dvs 233" or dvs233 or ellefore\$2 or khedezla\$2 or pristiq\$2 or pristiqs\$2 or "wy 45233" or wy45233 or 93413-62-8 or NG99554ANW).tw,kw,rn. (2126)
- 164 doxepin/ (10595)
- 165 (doxepin\$2 or adapin\$2 or anten or antenR or antenTM or aponal\$2 or co dox\$2 or curatin\$2 or deptran\$2 or desidox\$2 or doneurin\$2 or doxal\$2 or doxepine\$2 or expan or expanR or expanTM or gilex\$2 or mareen\$2 or "nsc 108160" or "p 3693a" or prudoxin\$2 or quitaxon\$2 or silenor\$2 or sinequan\$2 or sinquan\$2 or sinquane\$2 or zonalon\$2 or 1668-19-5 or 5ASJ6HUZ7D).tw,kw,rn. (12904)
- 166 duloxetine/ (13292)
- 167 (duloxetine\$2 or ariclaim\$2 or cymbalta\$2 or drizalma\$2 or dulane\$2 or duzela\$2 or irenka\$2 or "ly 227942" or ly227942 or "ly 248686" or ly248686 or xeristar\$2 or yentreve\$2 or 116539-59-4 or O5TNM5N07U).tw,kw,rn. (14606)
- 168 imipramine/ (47078)
- 169 (imipramine\$2 or antidep\$2 or antideprin\$2 or berkomin\$2 or chrytemin\$2 or daypress\$2 or deprinol\$2 or depzol\$2 or depsonil\$2 or ethipramine\$2 or fronil\$2 or "g 22150" or g22150 or "g 22355" or g22355 or ia pram\$2 or imavate\$2 or imidol\$2 or imipramide\$2 or imipramin\$2 or imiprin\$2 or imizin\$2 or imizine\$2 or janimine\$2 or melipramin\$2 or melipramine\$2 or norchlorimipramine\$2 or norpramine\$2 or novopramine\$2 or pramine\$2 or presamine\$2 or primonil\$2 or pryleun\$2 or psychoforin\$2 or psychoforine\$2 or sermonil\$2 or servipramine\$2 or sk pramine\$2 or talpramin\$2 or tofranil\$2 or trofanil\$2 or venefon\$2 or 50-49-7 or OGG85SX4E4).tw,kw,rn. (51728)
- 170 milnacipran/ (3157)
- 171 (milnacipran\$2 or "f 2207" or f2207 or "f 2695" or f2695 or fetzima\$2 or impulsor\$2 or ixel\$2 or levomilnacipran\$2 or midalcipran\$2 or savella\$2 or "tn 912" or tn912 or toledomin\$2 or 92623-85-3 or G56VK1HF36).tw,kw,rn. (3606)
- 172 venlafaxine/ (24848)
- 173 (venlafaxine\$2 or aplaven\$2 or dobupal\$2 or duofaxin\$2 or efectin\$2 or efexor\$2 or effexor\$2 or elafax\$2 or faxiprol\$2 or genexin\$2 or pracet\$2 or serosmine\$2 or sunveniz\$2 or trevilor\$2 or trevilor\$2 or vandral\$2 or vaxor\$2 or venix-xr\$2 or venla\$2 or venlabrain\$2 or venlafaxin\$2 or venlafaxina\$2 or venlalic\$2 or venlaneo\$2 or venlax\$2 or venlaxin\$2 or venlazid\$2 or venxin\$2 or venzip\$2 or viepax\$2 or "wy 45030" or wy45030 or zarelis\$2 or 93413-69-5 or GRZ5RCB1QG).tw,kw,rn. (26929)
- 174 bifemelane/ (240)
- 175 (bifemelane\$2 or alnert\$2 or celeport\$2 or "mci 2016" or mci2016 or 90293-01-9 or Z4501GN13G).tw,kw,rn. (365)
- 176 isocarboxazid/ (1949)

- 177 (isocarboxazid\$2 or bmih\$2 or enerzer\$2 or isocarboazide\$2 or isocarboxacid\$2 or isocarboxazide\$2 or marplan\$2 or "ro 5 0831" or "ro 50831" or "u 10387 59-63-2" or 34237V843T).tw,kw,rn. (2075)
- 178 moclobemide/ (5385)
- 179 (moclobemide\$2 or arima\$2 or aurorex\$2 or aurorix\$2 or deprenorm\$2 or feraken\$2 or manerix\$2 or meclobemide\$2 or moclaime\$2 or moclamide\$2 or moclamine\$2 or moclix\$2 or moclobamide\$2 or moclobamid\$2 or moclobeta\$2 or moclodura\$2 or moclonorm\$2 or rimoc\$2 or "ro 11 1163" or "ro 111163" or zorix\$2 or 71320-77-9 or PJ0Y7AZB63).tw,kw,rn. (8494)
- 180 monoamine oxidase A inhibitor/ (821)
- 181 MAO A inhibitor?.tw,kw,rn. (1367)
- 182 phenelzine/ (7359)
- 183 (phenelzine\$2 or benzylmethylhydrazine\$2 or beta phenethylhydrazine\$2 or beta phenylethylhydrazine\$2 or fenelzin\$2 or fenelzine\$2 or fenizin\$2 or mao rem\$2 or nardelzine\$2 or nardil\$2 or phenalzine\$2 or phenelzin\$2 or phenethylhydrazine\$2 or phenylethylhydrazine\$2 or stinerval\$2 or "w 1544" or w1544 or 51-71-8 or O408N561GF).tw,kw,rn. (7782)
- 184 toloxatone/ (316)
- 185 (toloxatone\$2 or humoryl\$2 or perenum\$2 or 29218-27-7 or 5T206015T5).tw,kw,rn. (408)
- 186 tranylcypromine/ (8284)
- 187 (tranylcypromine\$2 or jatrosom\$2 or parmodalin\$2 or parnate\$2 or parnitene\$2 or parnitine\$2 or "sk and f 385" or "skf 385" or "skf trans 385" or trancilpromine\$2 or tranlycypromine\$2 or tranlycyprominesulfate\$2 or tranlycyprominesulphate\$2 or tranilacipromina\$2 or transamine\$2 or tranlycypomia\$2 or tranlycypromide\$2 or tranlycypromin\$2 or tranlycypromine\$2 or tylciprine\$2 or 155-09-9 or 3E3V44J4Z9).tw,kw,rn. (9054)
- 188 mazindol/ (2493)
- 189 (mazindol\$2 or "AN-448" or dasten\$2 or degonan\$2 or diestet\$2 or drinamyl\$2 or fagolipo\$2 or liofindol\$2 or mazanor\$2 or manzindol\$2 or mazindole\$2 or pento adiparthrol\$2 or sanjorex\$2 or sanorex\$2 or slankosan\$2 or solu caps\$2 or teronac\$2 or teronak\$2 or 22232-71-9 or C56709M5NH).tw,kw,rn. (2989)
- 190 amitriptylinoxide/ (239)
- 191 (amitriptyline\$2 or amioxid-neuraxpharm\$2 or amitriptyline n oxide\$2 or dano or danoR or danoTM or equilibrin\$2 or 4317-14-0 or TYR2U59WMA).tw,kw,rn. (52554)
- 192 amoxapine/ (2733)
- 193 (amoxapine\$2 or adisen\$2 or amoxan\$2 or amoxapin\$2 or asendin\$2 or asendis\$2 or "cl 67,772" or "cl 67772" or "cl67,772" or "cl67772" or defanyl\$2 or demolox\$2 or desmethylloxapine\$2 or moxadil\$2 or 14028-44-5 or R63VQ857OT).tw,kw,rn. (2961)
- 194 demexiptiline/ (39)
- 195 (demexiptiline\$2 or demexiptiline\$2 or deparon\$2 or tinoran\$2 or 24701-51-7 or EYX738UZ5P).tw,kw,rn. (41)
- 196 desipramine/ (28138)
- 197 (desipramine\$2 or "aw 1151129" or aw1151129 or demethylimipramine\$2 or deprexan\$2 or desimipramine\$2 or desipramin\$2 or desipramine\$2 or desmethyl imipramin\$2 or desmethyl imipramine\$2 or desmethylimipramin\$2 or desmethylimipramine\$2 or despiramine\$2 or "ex 4355" or ex4355 or "g 15020" or "g 35020" or g15020 or g35020 or "jb 8181" or jb8181 or n demethylimipramine\$2 or nebril\$2 or norimipramine\$2 or norpramin\$2 or norpramine\$2 or nortimil\$2 or "nsc 114901" or nsc114901 or pentrofrane\$2 or pertofran\$2 or pertofrane\$2 or pertofrin\$2 or pertofran\$2 or petrofrane\$2 or petylyl\$2 or "rmi 9,384a" or "rmi 9384a" or "rmi9,384a" or rmi9384a or sertofren\$2 or 50-47-5 or 58-28-6 or TG537D343B).tw,kw,rn. (31523)
- 198 dibenzepin/ (765)

- 199 (dibenzepin\$2 or bibenzepin\$2 or deprex\$2 or dibenzepine\$2 or dibenzepinum\$2 or dibenzoazepine\$2 or ecatriil\$2 or "hf 1927" or hf1927 or "l.w. 1927" or neodalit\$2 or neodil\$2 or noveril\$2 or 4498-32-2 or 510SJZ1Y6L).tw,kw,rn. (1190)
- 200 dimetacrin/ (113)
- 201 (dimetacrin\$2 or dimetacrine\$2 or dimethacin\$2 or dimethacine\$2 or dimethacrin\$2 or dimethacrine\$2 or istonil\$2 or miroistonil\$2 or "sd 709" or 3759-07-7 or 4757-55-5 or O341NY501N).tw,kw,rn. (249)
- 202 dosulepin/ (2786)
- 203 (dothiepin\$2 or altapin\$2 or depresym\$2 or dosulepin\$2 or dosulepine\$2 or dothapax\$2 or dothiepin\$2 or idom or idomR or idomTM or prepadine\$2 or prothiaden\$2 or prothiadene\$2 or prothiadene\$2 or prothiadine\$2 or protiadene\$2 or 113-53-1 or 897-15-4 or W13O8Z27HL).tw,kw,rn. (3030)
- 204 imipraminoxide/ (106)
- 205 (imipraminoxide\$2 or elepsin\$2 or imipramine\$2 or imiprex\$2 or 6829-98-7 or 8MKS280XJW).tw,kw,rn. (51521)
- 206 lofepramine/ (1221)
- 207 (lofepramine\$2 or amplit\$2 or deftan\$2 or feprapax\$2 or gam#nil\$2 or "leo 640" or lomont\$2 or tymelyt\$2 or "whr 2908a" or 23047-25-8 or 26786-32-3 or OCA4JT7PAW).tw,kw,rn. (1694)
- 208 melitracen/ (433)
- 209 (melitracen\$2 or dixeran\$2 or melitracene\$2 or melixeran\$2 or metrisil\$2 or 5118-29-6 or 10563-70-9 or Q7T0Y1109Z).tw,kw,rn. (553)
- 210 metapramine/ (124)
- 211 (metapramine\$2 or "19560 rp" or "rp 19560" or timaxel\$2 or 21730-16-5 or 303954M7YF).tw,kw,rn. (172)
- 212 nitroxazepine/ (44)
- 213 (nitroxazepine\$2 or "233-go" or "2330 go" or "c 2330 go" or "c2330 go" or c2330go or sintamil\$2 or 16398-39-3 or CNU9GY55SI).tw,kw,rn. (74)
- 214 nordoxepin/ (291)
- 215 (nordoxepin\$2 or demethyldoxepin\$2 or desmethyldoxepin\$2 or "doxepin,nor\$2" or 1225-56-5 or F498JSH8R).tw,kw,rn. (440)
- 216 nortriptyline/ (17647)
- 217 (nortriptyline\$2 or acetexa\$2 or allegron\$2 or altile\$2 or ateben\$2 or atilev\$2 or avantyl\$2 or aventyl\$2 or desitriptyline\$2 or desmethylamitriptylin\$2 or desmethylamitriptyline\$2 or "l 38489" or martimil\$2 or noramitriptyline\$2 or norfenazin\$2 or noritren\$2 or norline\$2 or norpress\$2 or nortrilen\$2 or nortrilene\$2 or nortriptylin\$2 or nortriptyline\$2 or nortrix\$2 or nortryptilin\$2 or nortryptiline\$2 or nortryptiline\$2 or nortyline\$2 or norventyl\$2 or ortrip\$2 or pamelor\$2 or paxtibi\$2 or psychostyl\$2 or sensaval\$2 or sensival\$2 or vividyl\$2 or 72-69-5 or BL03SY4LXB).tw,kw,rn. (18953)
- 218 noxiptiline/ (222)
- 219 (noxiptiline\$2 or agedal\$2 or "bay 1521" or bay1521 or "bayer 1521" or dibenzoxin\$2 or elronon\$2 or nogedal\$2 or noxiphylin\$2 or noxiptilin\$2 or noxiptiline\$2 or noxiptillin\$2 or noxiptilline\$2 or noxiptylin\$2 or noxiptyline\$2 or noxyptiline\$2 or 24573-06-6 or 3362-45-6 or DF7D3NY7EL).tw,kw,rn. (315)
- 220 opipramol/ (1287)
- 221 (opipramol\$2 or dinsidon\$2 or ensidon\$2 or eusidon\$2 or "g 33040" or g33040 or insidon\$2 or nisidan\$2 or opipramole\$2 or pramolane\$2 or "rp 8307" or rp8307 or 315-72-0 or D23ZXO613C).tw,kw,rn. (1386)
- 222 propizepine/ (88)

- 223 (propizepin\$2 or propizepine\$2 or pyridobenzodiazepine\$2 or "up 106" or vagran\$2 or 10321-12-7 or 09B57945V9).tw,kw,rn. (1027)
- 224 protriptyline/ (2889)
- 225 (protriptyline\$2 or amimetilina\$2 or concordin\$2 or maximed\$2 or "mk 240" or mk240 or protriphyline\$2 or protryptyline\$2 or triptil\$2 or vivactil\$2 or 438-60-8 or 4NDU154T12).tw,kw,rn. (3304)
- 226 quinupramine/ (112)
- 227 (quinupramine\$2 or kevoxipril\$2 or kinupril\$2 or "lm 208" or 31721-17-2 or 29O61HFF4L).tw,kw,rn. (137)
- 228 tianeptine/ (1640)
- 229 (tianeptine\$2 or coaxil\$2 or "s 1574" or s1574 or stablon\$2 or 72797-41-2 or 0T493YFU8).tw,kw,rn. (2295)
- 230 trimipramine/ (4133)
- 231 (trimipramine\$2 or apo-trimip\$2 or eldoral\$2 or herphonal\$2 or "il 6001" or rhotrimine\$2 or "rp 7162" or sapilent\$2 or stangyl\$2 or sumontil\$2 or surmontil\$2 or trimepramine\$2 or trimeprimin\$2 or trimeprimine\$2 or trimepropimine\$2 or trimidura\$2 or trimineurin\$2 or trimipramine\$2 or trimoprimine\$2 or tripress\$2 or tydamine\$2 or 739-71-9 or 6S082C9NDT).tw,kw,rn. (4438)
- 232 or/117-231 [DRUG CLASSES/DRUGS OF INTEREST] (1483583)
- 233 incidence/ (733335)
- 234 incidenc\*.tw,kw. (2055546)
- 235 prevalence/ (1097648)
- 236 prevalen\*.tw,kw. (1992031)
- 237 factual database/ (112807)
- 238 ((admin\* or billing\* or claim? or factual or insurance or utili#ation) adj3 (data or database\* or data-base\* or databank\* or data-bank\* or dataset? or data-set? or statistic\*)).tw,kw. (147089)
- 239 drug utilization/ (42374)
- 240 or/233-239 [EPI FILTER] (4490422)
- 241 232 and 240 [DRUG CLASSES OF INTEREST - EPI FILTER] (75145)
- 242 exp animal/ or exp animal experimentation/ or exp animal model/ or exp animal experiment/ or nonhuman/ or exp vertebrate/ (55421554)
- 243 exp human/ or exp human experimentation/ or exp human experiment/ (43048494)
- 244 242 not 243 (12374929)
- 245 241 not 244 [ANIMAL-ONLY REMOVED] (67735)
- 246 (comment or editorial or letter or newspaper article or news).pt. (4064318)
- 247 245 not 246 [OPINION PIECES REMOVED] (66685)
- 248 conference abstract.pt. (4080457)
- 249 247 not 248 [CONFERENCE ABSTRACT REMOVED] (57454)
- 250 limit 249 to yr="2010-current" (31564)
- 251 250 use emczd [EMBASE RECORDS] (19401)
- 252 116 or 251 [BOTH DATABASES] (32396)
- 253 limit 252 to yr="2020-current" (4877)
- 254 remove duplicates from 253 (3418)
- 255 limit 252 to yr="2019" (3170)
- 256 remove duplicates from 255 (2252)
- 257 limit 252 to yr="2017-2018" (5693)
- 258 remove duplicates from 257 (4036)
- 259 limit 252 to yr="2015-2016" (5659)
- 260 remove duplicates from 259 (3933)

261 limit 252 to yr="2013-2014" (5722)  
262 remove duplicates from 261 (3960)  
263 limit 252 to yr="2011-2012" (4978)  
264 remove duplicates from 263 (3552)  
265 limit 252 to yr="2010" (2297)  
266 remove duplicates from 265 (1668)  
267 254 or 256 or 258 or 260 or 262 or 264 or 266 [TOTAL UNIQUE RECORDS] (22819)  
268 267 use ppez [MEDLINE UNIQUE RECORDS] (12968)  
269 267 use emczd [EMBASE UNIQUE RECORDS] (9851)

\*\*\*\*\*
